# Supplementary material
Source: Springer Nature journal article supplement (https://www.springermedizin.de/resource/supplementary/12874_2012_917_MOESM5_ESM.pdf/9433150)
Supplement: MOESM5 [file 9433150]

| Abrams[43]: Expanded Stages of Change (SOC) model                                        | Callaghan[44]: Expanded Stages of Change (SOC) & Processes of Change (POC) models (TTM)                                                                                                                                                                                                                                                                                                    | Oldenburg[45]: Expanded Stages of Change (SOC) model                                                                                    | Hu[46]: Adapted Theory of Planned Behaviour (TPB)                                                                             | Conrad[47]: Adapted Health Belief Model (HBM)                                             | <u>Themes for framework</u>        |
|------------------------------------------------------------------------------------------|--------------------------------------------------------------------------------------------------------------------------------------------------------------------------------------------------------------------------------------------------------------------------------------------------------------------------------------------------------------------------------------------|-----------------------------------------------------------------------------------------------------------------------------------------|-------------------------------------------------------------------------------------------------------------------------------|-------------------------------------------------------------------------------------------|------------------------------------|
| Enabling factors: Degree of awareness<br><br>Reinforcing or mediating factors: Awareness |                                                                                                                                                                                                                                                                                                                                                                                            | Pre-contemplation: Unaware of a problem or need to change                                                                               | Attitude toward behaviour: positive and negative feelings about smoking                                                       |                                                                                           | Beliefs about smoking              |
| Knowledge / attitudes                                                                    | POC:<br>Consciousness-raising: Efforts by the individual to seek new information and to gain understanding and feedback about the problem behavior / observations, confrontations, interpretations, bibliotherapy<br><br>Self-reevaluation: Emotional and cognitive reappraisal of values by the individual with respect to the problem behavior, imagery, corrective emotional experience | Decisional balance: Pros and cons of smoking (Velicer 1988)                                                                             | Attitude toward behaviour: Positive and negative feelings about smoking<br><br>Past behaviour (p.227): Previous quit attempts | Perceived susceptibility to a disease<br><br>Perceived seriousness of disease             | Perceived pros and cons of smoking |
| Organisational factors: Perceived norms                                                  | Stimulus control: Control of situations and other causes which trigger the problem behavior / adding stimuli that encourage alternative behaviors, restructuring the environment, avoiding high risk cues                                                                                                                                                                                  |                                                                                                                                         | Subjective norm: Perceptions of social pressure to quit from colleagues or for / from family                                  |                                                                                           | Perceived norms regarding smoking  |
| Motivation to attempt change                                                             | Self-liberation: Choice and commitment to change the problem behavior                                                                                                                                                                                                                                                                                                                      | Contemplation: Beginning to consider benefits of change<br>Preparation: Ready to change; starting to set goals                          | Priority of performing behaviour (quitting): It is / is not important to me; I see it as urgent, to be done soon vs no rush   | Cue-to-action variable (variable which moves the individual from contemplation to action) | Priority of quitting               |
| Reinforcing or mediating factors: Self-efficacy                                          | Self-liberation: including belief in the ability to change                                                                                                                                                                                                                                                                                                                                 | Self-efficacy (from Social Cognitive Theory, Bandura 1986): a person's confidence in their ability to take action and persist in action | Perceived behavioural control:<br><br>Perceived self-efficacy and perceived difficulty                                        | Perceived benefits of taking the path<br><br>Perceived barriers of taking the path        | Perceived ability to quit          |
